# Supplementary material for: α-Ketoglutarate promotes trophectoderm induction and maturation from naive human embryonic stem cells
Source: Springer Nature journal article supplement (doi:10.1038/s41556-025-01658-1), 2025-04-23
Supplement: MOESM1 [file 41556_2025_1658_MOESM1_ESM.pdf]

Reporting Summary

Nature Portfolio wishes to improve the reproducibility of the work that we publish. This form provides structure for consistency and transparency in reporting. For further information on Nature Portfolio policies, see our [Editorial Policies](#) and the [Editorial Policy Checklist](#).

Statistics

For all statistical analyses, confirm that the following items are present in the figure legend, table legend, main text, or Methods section.

|                                     |                                                                                                                                                                                                                                                                                                |
|-------------------------------------|------------------------------------------------------------------------------------------------------------------------------------------------------------------------------------------------------------------------------------------------------------------------------------------------|
| n/a                                 | Confirmed                                                                                                                                                                                                                                                                                      |
| <input type="checkbox"/>            | <input checked="" type="checkbox"/> The exact sample size ( <i>n</i> ) for each experimental group/condition, given as a discrete number and unit of measurement                                                                                                                               |
| <input type="checkbox"/>            | <input checked="" type="checkbox"/> A statement on whether measurements were taken from distinct samples or whether the same sample was measured repeatedly                                                                                                                                    |
| <input type="checkbox"/>            | <input checked="" type="checkbox"/> The statistical test(s) used AND whether they are one- or two-sided<br><i>Only common tests should be described solely by name; describe more complex techniques in the Methods section.</i>                                                               |
| <input checked="" type="checkbox"/> | <input type="checkbox"/> A description of all covariates tested                                                                                                                                                                                                                                |
| <input type="checkbox"/>            | <input checked="" type="checkbox"/> A description of any assumptions or corrections, such as tests of normality and adjustment for multiple comparisons                                                                                                                                        |
| <input type="checkbox"/>            | <input checked="" type="checkbox"/> A full description of the statistical parameters including central tendency (e.g. means) or other basic estimates (e.g. regression coefficient) AND variation (e.g. standard deviation) or associated estimates of uncertainty (e.g. confidence intervals) |
| <input type="checkbox"/>            | <input checked="" type="checkbox"/> For null hypothesis testing, the test statistic (e.g. <i>F</i> , <i>t</i> , <i>r</i> ) with confidence intervals, effect sizes, degrees of freedom and <i>P</i> value noted<br><i>Give P values as exact values whenever suitable.</i>                     |
| <input checked="" type="checkbox"/> | <input type="checkbox"/> For Bayesian analysis, information on the choice of priors and Markov chain Monte Carlo settings                                                                                                                                                                      |
| <input checked="" type="checkbox"/> | <input type="checkbox"/> For hierarchical and complex designs, identification of the appropriate level for tests and full reporting of outcomes                                                                                                                                                |
| <input checked="" type="checkbox"/> | <input type="checkbox"/> Estimates of effect sizes (e.g. Cohen's <i>d</i> , Pearson's <i>r</i> ), indicating how they were calculated                                                                                                                                                          |

Our web collection on [statistics for biologists](#) contains articles on many of the points above.

Software and code

Policy information about [availability of computer code](#)

|                 |                                                                                                                                                                                                                                                                                                                                                                                                                                                                                                                                                                                                                                                                                                                                                                                                                                           |
|-----------------|-------------------------------------------------------------------------------------------------------------------------------------------------------------------------------------------------------------------------------------------------------------------------------------------------------------------------------------------------------------------------------------------------------------------------------------------------------------------------------------------------------------------------------------------------------------------------------------------------------------------------------------------------------------------------------------------------------------------------------------------------------------------------------------------------------------------------------------------|
| Data collection | No software was used for data collection.                                                                                                                                                                                                                                                                                                                                                                                                                                                                                                                                                                                                                                                                                                                                                                                                 |
| Data analysis   | <p>Base calling and demultiplexing: bcl2fastq (v2.20.0.422; RRID:SCR_015058)<br/>Read quality control: FastQC (v0.11.9; RRID:SCR_014583)</p> <p>Alignment (RNAseq): STAR (v 2.7.2d; RRID:SCR_004463)</p> <p>ENCODE ATAC-seq pipeline (v 2.2.2; <a href="https://github.com/ENCODE-DCC/atac-seq-pipeline">https://github.com/ENCODE-DCC/atac-seq-pipeline</a>) within that:<br/>Bowtie2 (v 2.3.4.3; RRID:SCR_016368)<br/>Picard (v 2.20.7; RRID:SCR_006525)<br/>MACS2 (v 2.2.4; RRID:SCR_013291)<br/>bedtools (v 2.29.0; RRID:SCR_006646)<br/>idr (v 2.0.4.2)</p> <p>combine peak files from different conditions and get counts: bedtools (v v2.28.0; RRID:SCR_006646)<br/>annotate peaks and find enriched motifs: HOMER (v 4.11; RRID:SCR_010881)</p> <p>Cell Ranger (v 6.1.2; RRID:SCR_017344)</p> <p>R (v 4.2.1; RRID:SCR_001905)</p> |

R packages:  
 Differential gene expression; differential accessible peaks): DESeq2 (1.36.0; RRID:SCR\_015687)  
 preranked gene set enrichment analysis: fgsea (v 1.22.0; RRID:SCR\_020938)  
 rGREAT (v 2.1.12)  
 Seurat (v 4.3.0)  
 SeuratWrappers (v 0.3.1)  
 presto (v 1.0.0)  
 msigdb (v 7.5.1)  
 batchelor (v.1.6.2)  
 miloR (v1.2.0)  
 uwot (v.0.1.14)  
 Rfast (v 2.0.7)

GraphPad Prism (v 10.1.0(316))  
 Fiji/Image J (v 2.9.0/1.53t)  
 ilastik (v 1.3.3 and 1.4.1)

Bruker Compass DataAnalysis version 6.1  
 TASQ 2023b (Bruker)  
 Skyline (version 20.2.0.343)

For manuscripts utilizing custom algorithms or software that are central to the research but not yet described in published literature, software must be made available to editors and reviewers. We strongly encourage code deposition in a community repository (e.g. GitHub). See the Nature Portfolio [guidelines for submitting code & software](#) for further information.

## Data

Policy information about [availability of data](#)

All manuscripts must include a [data availability statement](#). This statement should provide the following information, where applicable:

- Accession codes, unique identifiers, or web links for publicly available datasets
- A description of any restrictions on data availability
- For clinical datasets or third party data, please ensure that the statement adheres to our [policy](#)

All NGS datasets generated in this study are available on GEO GSE247634. Datasets utilized in the in vivo reference include 6 human embryonic datasets covering various stages of embryogenesis: Yan et al. (GSE36552), Petropoulos et al. (E-MTAB-3929), Meistermann et al. (PRJEB30442), Yanagida et al. (GSE171820), Xiang et al. (GSE136447), Tyser et al. (E-MTAB-9388). The processed dataset, including predicted annotations, UMAP and sorted cell counts, can be retrieved from <https://petropoulos-lanner-labs.clintec.ki.se/dataset.download.html>.

## Research involving human participants, their data, or biological material

Policy information about studies with [human participants or human data](#). See also policy information about [sex, gender \(identity/presentation\), and sexual orientation](#) and [race, ethnicity and racism](#).

Reporting on sex and gender

N/A

Reporting on race, ethnicity, or other socially relevant groupings

N/A

Population characteristics

N/A

Recruitment

N/A

Ethics oversight

N/A

Note that full information on the approval of the study protocol must also be provided in the manuscript.

## Field-specific reporting

Please select the one below that is the best fit for your research. If you are not sure, read the appropriate sections before making your selection.

☒ Life sciences ☐ Behavioural & social sciences ☐ Ecological, evolutionary & environmental sciences

For a reference copy of the document with all sections, see [nature.com/documents/nr-reporting-summary-flat.pdf](https://nature.com/documents/nr-reporting-summary-flat.pdf)

## Life sciences study design

All studies must disclose on these points even when the disclosure is negative.

Sample size

No statistical method was used to determine sample size. Sample sizes were chosen based on previous experience or similar studies (Development: <https://doi.org/10.1242/dev.180620>; Nature Cell Biology: <https://doi.org/10.1038/s41556-022-00916-w>).

All sample sizes are indicated in the figure legends or the manuscript.

For stem cells, RT-qPCR, immunostaining blastoids, experiments were performed in three independent replicates unless stated otherwise in the figure legends.

GC/MS-TOF analysis was performed for three biological replicates.

hPTM quantification was performed for three or four biological replicates.

|                 |                                                                                                                                                                                                                                                                                                                                                                                         |
|-----------------|-----------------------------------------------------------------------------------------------------------------------------------------------------------------------------------------------------------------------------------------------------------------------------------------------------------------------------------------------------------------------------------------|
| Data exclusions | No data was excluded for analyses unless stated otherwise in the methods.                                                                                                                                                                                                                                                                                                               |
| Replication     | scRNA-seq was performed three times with no biological replicates except for the 120h blastoid samples for which 2 biological replicates were sequenced. ATAC-seq, mRNA-seq, GC/MS-TOF and hPTM quantification were performed once with at least 2 biological replicates. All other experiments in this study were repeated three times, unless stated otherwise in the figure legends. |
| Randomization   | Allocation of cell culture samples to treated or control groups was randomized in cell culture wells. Control and treatment samples were collected and analyzed concurrently. Representative images and images for immunofluorescence analysis were acquired with no particular bias.                                                                                                   |
| Blinding        | Experimental design and sample collection was performed by the same individual. Analysis of scRNA-seq, ATAC-seq, GC/MS-TOF and hPTM quantification was performed by different investigators. No further blinding was required as the reported analysis do not involve procedures susceptible to investigator bias.                                                                      |

## Reporting for specific materials, systems and methods

We require information from authors about some types of materials, experimental systems and methods used in many studies. Here, indicate whether each material, system or method listed is relevant to your study. If you are not sure if a list item applies to your research, read the appropriate section before selecting a response.

### Materials & experimental systems

| n/a                                 | Involved in the study                                     |
|-------------------------------------|-----------------------------------------------------------|
| <input type="checkbox"/>            | <input checked="" type="checkbox"/> Antibodies            |
| <input type="checkbox"/>            | <input checked="" type="checkbox"/> Eukaryotic cell lines |
| <input checked="" type="checkbox"/> | <input type="checkbox"/> Palaeontology and archaeology    |
| <input checked="" type="checkbox"/> | <input type="checkbox"/> Animals and other organisms      |
| <input checked="" type="checkbox"/> | <input type="checkbox"/> Clinical data                    |
| <input checked="" type="checkbox"/> | <input type="checkbox"/> Dual use research of concern     |
| <input checked="" type="checkbox"/> | <input type="checkbox"/> Plants                           |

### Methods

| n/a                                 | Involved in the study                           |
|-------------------------------------|-------------------------------------------------|
| <input checked="" type="checkbox"/> | <input type="checkbox"/> ChIP-seq               |
| <input checked="" type="checkbox"/> | <input type="checkbox"/> Flow cytometry         |
| <input checked="" type="checkbox"/> | <input type="checkbox"/> MRI-based neuroimaging |

## Antibodies

### Antibodies used

#### Primary antibodies:

anti-GATA3 1 in 250 (2D); 1 in 500 (3D) Abcam, ab199428  
 anti-NANOG 1 in 250 (2D); 1 in 200 (3D) Abcam, ab173368  
 anti-BRACHYURY 1 in 250 R&D Systems, AF2085  
 anti-aPKCζ 1 in 100 Santa Cruz Biotechnology, sc17781  
 anti-YAP1 1 in 100 Proteintech, 13584-1-AP  
 anti-H3K27Ac 1 in 500 Active Motif, 39685  
 anti-GATA4 1 in 250 eBioscience, 14-9980-82  
 anti-GATA6 1 in 100 R&D Systems, AF1700  
 anti-P300 1 in 400 Cell Signaling Technologies, CST-86377T  
 anti-SOX2 1 in 200 R&D Systems, AF2018  
 anti-HLA-G 1 in 200 Santa Cruz Biotechnology, sc21799  
 anti-hCgbeta 1 in 200 Abcam, ab53087

#### Secondary antibodies:

Donkey anti-Rabbit, Alexa Fluor Plus 488, Highly Cross-Adsorbed 1 in 500 Fischer Scientific, A32790  
 Donkey anti-Mouse, Alexa Fluor® 568 Highly Cross-Adsorbed 1 in 500 Fischer Scientific, 10236683  
 Donkey anti-Goat, Alexa Fluor™ 568, Cross-Adsorbed 1 in 500 Fischer Scientific, A11057  
 Donkey anti-Rabbit, Alexa Fluor® Plus 647 Highly Cross-Adsorbed 1 in 250 Fischer Scientific, 16239260  
 Donkey anti-Rat, Alexa Fluor® 488 Highly Cross-Adsorbed 1 in 500 Fischer Scientific, A21208  
 Donkey anti-Goat, Alexa Fluor™ 647, Cross-Adsorbed 1 in 250 Fischer Scientific, A21447  
 Donkey anti-Mouse, Alexa Fluor® 647 Highly Cross-Adsorbed 1 in 250 Fischer Scientific, A31571

#### Hashtag antibodies:

TotalSeq™-A0251 anti-human Hashtag 1 Antibody, mouse, Biolegend 394601  
 TotalSeq™-A0252 anti-human Hashtag 1 Antibody, mouse, Biolegend 394603  
 TotalSeq™-A0253 anti-human Hashtag 1 Antibody, mouse, Biolegend 394605  
 TotalSeq™-A0254 anti-human Hashtag 1 Antibody, mouse, Biolegend 394607  
 TotalSeq™-A0255 anti-human Hashtag 1 Antibody, mouse, Biolegend 394609  
 TotalSeq™-A0256 anti-human Hashtag 1 Antibody, mouse, Biolegend 394611

## Validation

All antibodies were previously validated either by vendors or publications.

GATA3 Abcam, ab199428; cited in 27 publications  
<https://www.abcam.com/en-us/products/primary-antibodies/gata3-antibody-epr16651-chip-grade-ab199428?srsltid=AfmBOoqUQitC-WHY5jPBntdTF1A8LBNF7DeeS8RwNnBRg-vsD6oKLADj>

NANOG Abcam, ab173368; cited in 7 publications  
[https://www.abcam.com/en-us/products/primary-antibodies/nanog-antibody-23d2-3c6-ab173368?srsltid=AfmBOorXd066aJQVKmo\\_\\_GQuvXYWn9f59nbZD4sjXpDL6bpsyZzs\\_TwE](https://www.abcam.com/en-us/products/primary-antibodies/nanog-antibody-23d2-3c6-ab173368?srsltid=AfmBOorXd066aJQVKmo__GQuvXYWn9f59nbZD4sjXpDL6bpsyZzs_TwE)

BRACHYURY R&D Systems, AF2085; cited in 269 publications  
[https://www.rndsystems.com/products/human-mouse-brachyury-antibody\\_af2085](https://www.rndsystems.com/products/human-mouse-brachyury-antibody_af2085)

aPKCζ Santa Cruz Biotechnology, sc17781; cited in 142 publications  
[https://www.scbt.com/p/pkc-zeta-antibody-h-1?srsltid=AfmBOooV\\_P6tE-18E2CjL\\_rHO\\_EotaXcl8FipsZVHCZKycJJo8ev8ErT](https://www.scbt.com/p/pkc-zeta-antibody-h-1?srsltid=AfmBOooV_P6tE-18E2CjL_rHO_EotaXcl8FipsZVHCZKycJJo8ev8ErT)

YAP1 Proteintech, 13584-1-AP; cited in 301 publications  
[https://www.ptglab.com/products/YAP1-Antibody-13584-1-AP.htm?srsltid=AfmBOorWDTLRKpBQeu9UwfQPC3bvLos2E45otHPKTVHSGKoTn\\_rAmRCC](https://www.ptglab.com/products/YAP1-Antibody-13584-1-AP.htm?srsltid=AfmBOorWDTLRKpBQeu9UwfQPC3bvLos2E45otHPKTVHSGKoTn_rAmRCC)

H3K27Ac Active Motif, 39685 clone: MABI 0309; cited in 18 publications  
<https://www.activemotif.com/catalog/details/39685>

GATA4 (eBioEvan), eBioscience, 14-9980-82; cited in 14 publications  
<https://www.thermofisher.com/antibody/product/Gata-4-Antibody-clone-eBioEvan-Monoclonal/14-9980-82>

GATA6 R&D Systems, AF1700; cited in 139 publications  
[https://www.rndsystems.com/products/human-gata-6-antibody\\_af1700](https://www.rndsystems.com/products/human-gata-6-antibody_af1700)

P300 Cell Signaling Technologies, CST-86377T; cited in 5 publications  
<https://www.cellsignal.com/products/primary-antibodies/p300-d8z4e-rabbit-mab/86377?srsltid=AfmBOoqvWUL6aBLcoeVpT5ITarFvSw7r2n99oZMJmm-5Cud9OeMrJwQd>

SOX2 R&D Systems, AF2018; cited in 379 publications  
[https://www.rndsystems.com/products/human-mouse-rat-sox2-antibody\\_af2018](https://www.rndsystems.com/products/human-mouse-rat-sox2-antibody_af2018)

HLA-G Santa Cruz Biotechnology, sc21799; cited in 83 publications  
[https://www.scbt.com/p/hla-g-antibody-4h84?srsltid=AfmBOop7O1txDcs4k5qpLDI7qRcXDg-yP\\_eTEqRY5GAfbzCnXyNDpfYE](https://www.scbt.com/p/hla-g-antibody-4h84?srsltid=AfmBOop7O1txDcs4k5qpLDI7qRcXDg-yP_eTEqRY5GAfbzCnXyNDpfYE)

hCgbeta Abcam, ab53087; cited in 13 publications  
<https://www.abcam.com/en-us/products/primary-antibodies/hcg-beta-antibody-ab53087?srsltid=AfmBOorGNLUeshAe4yYuqhKlpfeBvB8bpnjuo3YULQR6hdaYiFfayp-v>

TotalSeq™-A0251 anti-human Hashtag 1 Antibody, mouse, Biolegend 394601; cited in 16 publications  
<https://www.biolegend.com/en-us/products/totalseq-a0251-anti-human-hashtag-1-16080>

TotalSeq™-A0252 anti-human Hashtag 1 Antibody, mouse, Biolegend 394603; cited in 17 publications  
<https://www.biolegend.com/en-us/products/totalseq-a0252-anti-human-hashtag-2-antibody-16081>

TotalSeq™-A0253 anti-human Hashtag 1 Antibody, mouse, Biolegend 394605; cited in 14 publications  
<https://www.biolegend.com/en-us/products/totalseq-a0253-anti-human-hashtag-3-antibody-16084>

TotalSeq™-A0254 anti-human Hashtag 1 Antibody, mouse, Biolegend 394607; cited in 15 publications  
<https://www.biolegend.com/en-us/products/totalseq-a0254-anti-human-hashtag-4-antibody-16086>

TotalSeq™-A0255 anti-human Hashtag 1 Antibody, mouse, Biolegend 394609; cited in 12 publications  
<https://www.biolegend.com/en-us/products/totalseq-a0255-anti-human-hashtag-5-antibody-16088>

TotalSeq™-A0256 anti-human Hashtag 1 Antibody, mouse, Biolegend 394611; cited in 10 publications  
<https://www.biolegend.com/en-us/products/totalseq-a0256-anti-human-hashtag-6-antibody-16089>

## Eukaryotic cell lines

Policy information about [cell lines and Sex and Gender in Research](#)

|                                                                      |                                                                                                                                                                                |
|----------------------------------------------------------------------|--------------------------------------------------------------------------------------------------------------------------------------------------------------------------------|
| Cell line source(s)                                                  | H9 (WA09, WiCell) and HNES1 (Nichols Lab, DOI: 10.1016/j.stemcr.2016.02.005, PMID: 26947977) both provided by the Brickman lab. Mouse embryonic fibroblasts (ACTT, SCRC-1045). |
| Authentication                                                       | Cell lines were not further authenticated.                                                                                                                                     |
| Mycoplasma contamination                                             | All the cell lines are tested negative for mycoplasma contamination.                                                                                                           |
| Commonly misidentified lines<br>(See <a href="#">ICLAC</a> register) | No commonly misidentified lines were used in this study.                                                                                                                       |

## Plants

---

Seed stocks

N/A

Novel plant genotypes

N/A

Authentication

N/A
